# Supplementary material for: Comparison of the Clinical Effectiveness of Correcting Different Types of Astigmatism with Small Incision Lenticule Extraction
Source: MDPI journal article supplement (doi:10.3390/jcm12216941), 2023-11-06
Supplement: s1 [file s1]

**Table S1. Outcome of all three groups: with the rule (WTR), against the rule (ATR) and oblique astigmatism, comparison of low and high astigmatism groups over time.**

| Parameter                                                                                                                                                                | Sphere<br>(Mean Diopter ±SD) |                  |       | Cylinder<br>(Mean Diopter ±SD) |                  |       | Spherical Equivalent<br>(Mean Diopter ±SD) |                  |      | UDVA<br>(Mean ±SD) |                  |       | BCDVA<br>(Mean ±SD) |                  |       |
|--------------------------------------------------------------------------------------------------------------------------------------------------------------------------|------------------------------|------------------|-------|--------------------------------|------------------|-------|--------------------------------------------|------------------|------|--------------------|------------------|-------|---------------------|------------------|-------|
| Cylinder                                                                                                                                                                 |                              |                  |       |                                |                  |       |                                            |                  |      |                    |                  |       |                     |                  |       |
| Timing                                                                                                                                                                   | Low                          | High<br>(>2.50D) | P=X   | Low                            | High<br>(>2.50D) | P=X   | Low                                        | High<br>(>2.50D) | P=X  | Low                | High<br>(>2.50D) | P=X   | Low                 | High<br>(>2.50D) | P=X   |
| WTR Astigmatism                                                                                                                                                          |                              |                  |       |                                |                  |       |                                            |                  |      |                    |                  |       |                     |                  |       |
| Preoperative                                                                                                                                                             | -4.7 ± 2.3                   | -4.2 ± 2.7       | 0.20  | -1.4 ± 0.5                     | -3.5 ± 1.0       | <0.00 | -5.4 ± 2.3                                 | -6.0 ± 2.7       | 0.14 | 0.08 ± 0.1         | 0.09 ± 0.07      | 0.53  | 0.9 ± 0.13          | 0.8 ± 0.19       | <0.00 |
| Week 1                                                                                                                                                                   | -0.13 ± 0.61                 | -0.24 ± 0.85     | 0.39  | -0.1 ± 0.28                    | -0.3 ± 0.41      | 0.001 | -0.18 ± 0.62                               | -0.39 ± 0.85     | 0.09 | 0.87 ± 0.18        | 0.69 ± 0.24      | <0.00 | 0.93 ± 0.12         | 0.78 ± 0.21      | <0.00 |
| Month 2                                                                                                                                                                  | -0.19 ± 0.6                  | -0.24 ± 0.81     | 0.69  | -0.16 ± 0.28                   | -0.38 ± 0.53     | 0.01  | -0.27 ± 0.62                               | -0.44 ± 0.80     | 0.21 | 0.85 ± 0.20        | 0.75 ± 0.24      | 0.02  | 0.91 ± 0.15         | 0.86 ± 0.19      | 0.125 |
| Month 8                                                                                                                                                                  | -0.22 ± 0.66                 | -0.19 ± 0.68     | 0.89  | -0.26 ± 0.35                   | -0.48 ± 0.47     | 0.035 | -0.34 ± 0.68                               | -0.43 ± 0.72     | 0.58 | 0.86 ± 0.19        | 0.81 ± 0.25      | 0.41  | 0.95 ± 0.10         | 0.90 ± 0.13      | 0.32  |
| Month 12                                                                                                                                                                 | -0.14 ± 0.45                 | -0.38 ± 1.2      | 0.32  | -0.33 ± 0.40                   | -0.43 ± 0.50     | 0.36  | -0.30 ± 0.45                               | -0.60 ± 1.1      | 0.20 | 0.81 ± 0.22        | 0.69 ± 0.30      | 0.10  | 0.84 ± 0.39         | 0.82 ± 0.22      | 0.76  |
| ATR Astigmatism                                                                                                                                                          |                              |                  |       |                                |                  |       |                                            |                  |      |                    |                  |       |                     |                  |       |
| Preoperative                                                                                                                                                             | -3.5 ± 1.8                   | -1.6 ± 0.18      | <0.00 | -1.15 ± 0.39                   | -2.88 ± 0.53     | <0.00 | -4.1 ± 1.86                                | -3.1 ± 0.18      | 0.01 | 0.09 ± 0.05        | -0.05 ± 0.04     | 0.004 | -0.97 ± 0.08        | 0.85 ± 0.07      | 0.25  |
| Week 1                                                                                                                                                                   | -0.01 ± 0.22                 | NA               | NA    | -0.03 ± 0.11                   | NA               | NA    | -0.03 ± 0.2                                | NA               | NA   | 0.96 ± 0.11        | NA               | NA    | 0.98 ± 0.07         | NA               | NA    |
| Month 2                                                                                                                                                                  | -0.08 ± 0.22                 | NA               | NA    | -0.02 ± 0.09                   | NA               | NA    | -0.08 ± 0.22                               | NA               | NA   | 0.97 ± 0.11        | NA               | NA    | 0.99 ± 0.06         | NA               | NA    |
| Month 8                                                                                                                                                                  | -0.01 ± 0.14                 | NA               | NA    | -0.13 ± 0.25                   | NA               | NA    | -0.08 ± 0.15                               | NA               | NA   | 0.95 ± 0.09        | NA               | NA    | 0.98 ± 0.04         | NA               | NA    |
| Month 12                                                                                                                                                                 | 0.0 ± 0.0                    | -0.0 ± 0.0       | NA    | -0.03 ± 0.11                   | -0.06 ± 0.18     | 0.12  | -0.01 ± 0.06                               | -0.03 ± 0.09     | 0.12 | 0.98 ± 0.07        | 0.85 ± 0.07      | 0.21  | 0.98 ± 0.07         | 1.0 ± 0.0        | NA    |
| Oblique Astigmatism                                                                                                                                                      |                              |                  |       |                                |                  |       |                                            |                  |      |                    |                  |       |                     |                  |       |
| Preoperative                                                                                                                                                             | -5.0 ± 3.6                   | -5.5 ± 1.5       | 0.47  | -1.2 ± 0.41                    | -2.7 ± 1.13      | <0.00 | -5.7 ± 3.6                                 | -6.8 ± 1.6       | 0.13 | -0.09 ± 0.08       | -0.04 ± 0.02     | 0.004 | 0.89 ± 0.16         | 0.88 ± 0.16      | 0.85  |
| Week 1                                                                                                                                                                   | -0.73 ± 1.3                  | -0.25 ± 0.55     | 0.09  | -0.05 ± 0.16                   | -0.13 ± 0.23     | 0.40  | -0.76 ± 1.3                                | -0.31 ± 0.56     | 0.16 | 0.71 ± 0.34        | 0.79 ± 0.22      | 0.44  | 0.85 ± 0.18         | 0.90 ± 0.14      | 0.37  |
| Month 2                                                                                                                                                                  | -0.87 ± 1.63                 | -0.19 ± 0.44     | 0.045 | -0.20 ± 0.36                   | -0.06 ± 0.18     | 0.15  | -0.97 ± 1.63                               | -0.22 ± 0.53     | 0.04 | 0.72 ± 0.37        | 0.80 ± 0.27      | 0.268 | 0.91 ± 0.14         | 0.90 ± 0.13      | 0.88  |
| Month 8                                                                                                                                                                  | -0.62 ± 1.3                  | -0.33 ± 0.58     | 0.60  | -0.14 ± 0.32                   | -0.12 ± 0.30     | 0.22  | -0.68 ± 1.42                               | -0.33 ± 0.58     | 0.52 | 0.82 ± 0.33        | 0.83 ± 0.32      | 0.88  | 0.86 ± 0.28         | 0.89 ± 0.22      | 0.86  |
| Month 12                                                                                                                                                                 | -0.57 ± 1.1                  | -1.24 ± 1.06     | 0.52  | -0.11 ± 0.33                   | 0.0 ± 0.0        | NA    | -0.62 ± 1.2                                | -1.25 ± 1.1      | 0.55 | 0.81 ± 0.30        | 0.84 ± 0.32      | 0.92  | 0.94 ± 0.11         | 0.88 ± 0.14      | 0.38  |
| BCDVA = Best Correct Distance Visual Acuity<br>NA = Not Available (numbers too small to analyze)<br>SD = Standard Deviation<br>UDVA = Uncorrected Distance Visual Acuity |                              |                  |       |                                |                  |       |                                            |                  |      |                    |                  |       |                     |                  |       |
